# Supplementary material for: Vibrating Mesh Nebulisation of Pro-Antimicrobial Peptides for Use in Cystic Fibrosis
Source: MDPI journal article supplement (doi:10.3390/pharmaceutics11050239), 2019-05-17
Supplement: s1 [file s1]

# Supplementary Materials: Vibrating Mesh Nebulisation of Pro-Antimicrobial Peptides for Use in Cystic Fibrosis

Éanna Forde, Graeme Kelly, Louise Sweeney, Deirdre Fitzgerald-Hughes, Ronan MacLoughlin and Marc Devocelle

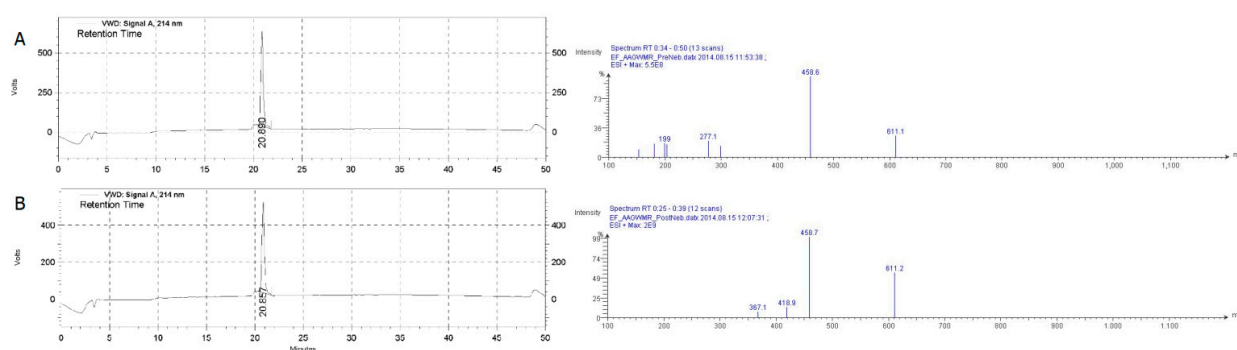

**Figure S1.** HPLC and electrospray ionisation mass spectrometry of AAG-WMR before (A) and after (B) nebulisation. Retention times 20.890 min and 20.857 min. The signals at  $m/z$  = 611.1, 458.6, and 367.1 are the  $[M + 3 H]^{3+}$ ,  $[M + 4 H]^{4+}$ , and  $[M + 5 H]^{5+}$  respectively for AAG-WMR.

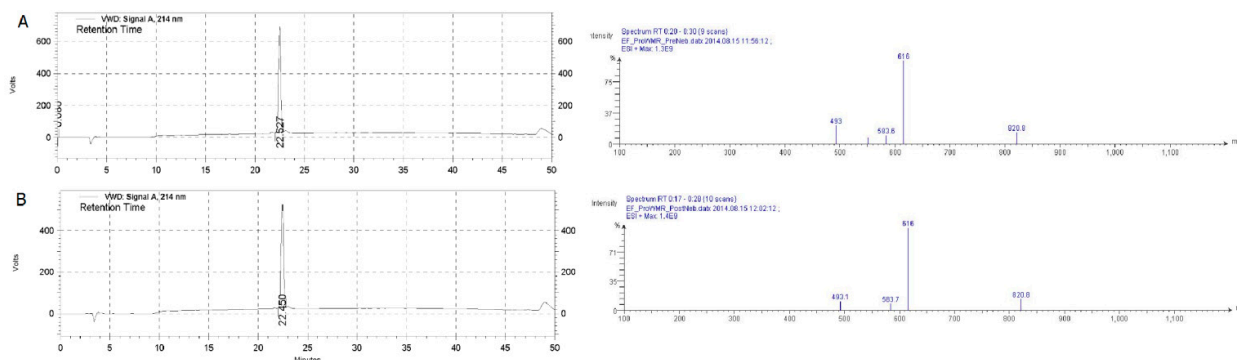

**Figure S2.** HPLC and electrospray ionisation mass spectrometry of pro-WMR before (A) and after (B) nebulisation. Retention times 22.527 min and 22.450 min. The signals at  $m/z$  = 820.8, 616, and 493 are the  $[M + 3 H]^{3+}$ ,  $[M + 4 H]^{4+}$ , and  $[M + 5 H]^{5+}$  respectively for pro-WMR.

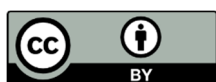

© 2019 by the authors. Submitted for possible open access publication under the terms and conditions of the Creative Commons Attribution (CC BY) license (<http://creativecommons.org/licenses/by/4.0/>).
